# Supplementary material for: Caregiving-related experiences associated with depression severity and its symptomatology among caregivers of individuals with a severe mental disorder: an online cross-sectional study
Source: Springer Nature journal article supplement (doi:10.1007/s00406-022-01451-3), 2022-06-30
Supplement: MOESM1 [file 23223852]

## Supplementary Material for the Article

### *Caregiving-related experiences associated with depression severity and its symptomatology among caregivers of individuals with a severe mental disorder: an online cross-sectional study*

Louis-Ferdinand LESPINE<sup>a,b</sup> (PhD), Anne-Lise BOHEC<sup>a,c</sup> (PhD) Jean-Michel DOREY<sup>d</sup> (MD, PhD), Céline DUBIEN BERBEY<sup>a</sup> (PhD), Charles LOURIoux<sup>a</sup>, Thierry D'AMATO<sup>a,c</sup> (MD, PhD), Isabelle ROUCH<sup>e</sup> (MD, PhD), Marie-Odile KREBS (MD, PhD), Romain REY<sup>a,c</sup> (MD, PhD)

<sup>a</sup> University Lyon 1, Villeurbanne, France ; Schizophrenia Expert Center, Le Vinatier Hospital, Bron, France ; Fondation FondaMental, Créteil, France

<sup>b</sup> Service Universitaire d'Addictologie de Lyon, Le Vinatier Hospital, Bron, France

<sup>c</sup> INSERM, U1028; CNRS, UMR5292; Lyon Neuroscience Research Center, Psychiatric Disorders: from Resistance to Response Team, Lyon, France

<sup>d</sup> INSERM U1028, CNRS, UMR 5292, Lyon Neuroscience Research Center, EDUWELL, Lyon, France; Lyon 2 University ; Pôle PsyPA, Le Vinatier Hospital, Bron, France

<sup>e</sup> Neurology Unit, CM2R, CHU de Saint Etienne, France ; Clinical and Research Memory Center of Lyon, Villeurbanne, France; INSERM, U1219, Bordeaux Population Health Center, University of Bordeaux, France

### CONTENTS

**Table S1.** Descriptive statistics of the Center for Epidemiologic Studies-Depression (CES-D) scale. N=384.

**Table S2.** Items of the Center for Epidemiologic Studies-Depression (CES-D).

**Table S3.** Descriptive statistics of the Zarit Burden Interview (ZBI). N=384.

**Table S4.** Zarit Burden Interview (ZBI).

**Table S5.** Descriptive statistics of the Brief Experience of Caregiving Inventory (BECI). N=384.

**Table S6.** Brief Experience of Caregiving Inventory (BECI).

**Table S7.** Pearson's correlations between scales (total scores). N=384.

**Table S8.** Partial correlations matrix of network 1a (Fig. 1a).

**Fig S1.** Bootstrap confidence intervals (CIs) of estimated edge-weights in network 1a.

**Table S9.** Summary of bootstrap results for network 1a.

**Fig S2.** Average correlations between centrality indices (strength) of networks sampled with persons dropped and the original sample (network 1a).

**Table S10.** Partial correlations matrix of network 1b (Fig. 1b).

**Fig S3.** Bootstrap confidence intervals (CIs) of estimated edge-weights in network 1b.

**Table S11.** Summary of bootstrap results for network 1b.

**Fig S4.** Average correlations between centrality indices (strength) of networks sampled with persons dropped and the original sample (network 1b).

**Table S12.** Partial correlations matrix of network 2a (Fig. 2a).

**Fig S5.** Bootstrap confidence intervals (CIs) of estimated edge-weights in network 2a.

**Table S13.** Summary of bootstrap results for network 2a.

**Fig S6.** Average correlations between centrality indices (strength) of networks sampled with persons dropped and the original sample (network 2a).

**Table S14.** Partial correlations matrix of network 2b (Fig. 2b).

**Fig S7.** Bootstrap confidence intervals (CIs) of estimated edge-weights in network 2b.

**Table S15.** Summary of bootstrap results for network 2b.

**Fig. S8.** Average correlations between centrality indices (strength) of networks sampled with persons dropped and the original sample (network 2b).

**Table S16.** Partial correlations matrix of network 3a (Fig. 3a).

**Table S17.** Partial correlations matrix of network 3b (Fig. 3b).

**Table S1.** Descriptive statistics of the Center for Epidemiologic Studies-Depression (CES-D) scale. N=384.

|                       | Mean (SD) [min-max] | Median (IQR) |
|-----------------------|---------------------|--------------|
| Total score           | 18.2 (10.1) [1-56]  | 17.0 (14.0)  |
|                       | n (%)               |              |
| Total score $\geq$ 16 | 209 (54.4)          |              |
| Total score $\geq$ 20 | 151 (39.3)          |              |

**Table S2.** Items of the Center for Epidemiologic Studies-Depression (CES-D).

|                               |     |
|-------------------------------|-----|
| Feeling bothered              | D1  |
| Appetite changes              | D2  |
| Feeling blue                  | D3  |
| Lack of feeling good          | D4  |
| Difficulty with concentrating | D5  |
| Depressed mood                | D6  |
| Everything was an effort      | D7  |
| Hopelessness                  | D8  |
| Feeling of failure            | D9  |
| Fearful                       | D10 |
| Sleep disturbances            | D11 |
| Lack of happiness             | D12 |
| Talking less                  | D13 |
| Lonely                        | D14 |
| People unfriendly             | D15 |
| Lack of enjoyment             | D16 |
| Crying                        | D17 |
| Sadness                       | D18 |
| Feeling disliked by others    | D19 |
| Inability to get going        | D20 |

**Table S3.**  
Descriptive statistics  
of the Zarit Burden  
Interview (ZBI).  
N=384.

|                                                                | Mean (SD) [min-max] | Median (IQR) |
|----------------------------------------------------------------|---------------------|--------------|
| Total score (SD) [min-max]                                     | 38.1 (18.4) [0-85]  | 38.0 (25.25) |
| Negative Emotion<br>(items 4, 5, 7, 9, 10, 15, 16, 17, 18, 19) | 17.4 (8.7) [0-40]   | 17.0 (12.25) |
| Interpersonal Relationship<br>(items 6, 11, 12, 13)            | 5.6 (4.5) [0-16]    | 5.0 (8.0)    |
| Time Demand<br>(items 1, 2, 3)                                 | 5.0 (3.2) [0-12]    | 5.0 (4.0)    |
| Patient's Dependence<br>(items 8, 14)                          | 5.2 (2.3) [0-8]     | 5.5 (3.0)    |
| Self-accusation/Guilt<br>(items 20, 21)                        | 2.9 (2.0) [0-8]     | 3.0 (2.0)    |
|                                                                |                     |              |
|                                                                | n (%)               |              |
| Little or no burden (total score $\leq$ 20)                    | 71 (18.5)           |              |
| Mild to moderate burden (total score: 21-40)                   | 143 (37.2)          |              |
| Moderate to severe (total score: 41-60)                        | 124 (32.3)          |              |
| Severe (total score $>$ 60)                                    | 46 (12.0)           |              |

**Table S4.** Zarit Burden Interview (ZBI).

|                                                   |        |
|---------------------------------------------------|--------|
| Patient asks for more help than he/she needs      | ZBI 1  |
| Not having enough time for yourself               | ZBI 2  |
| Stressed of fulfilling different responsibilities | ZBI 3  |
| Embarrassed of patient behavior                   | ZBI 4  |
| Feel angry around patient                         | ZBI 5  |
| Negative effect on other relationships            | ZBI 6  |
| Afraid of patient's future                        | ZBI 7  |
| Patient is too dependent                          | ZBI 8  |
| Feel strained around patient                      | ZBI 9  |
| Health affected by caregiving                     | ZBI 10 |
| Having inadequate privacy                         | ZBI 11 |
| Suffering in social life                          | ZBI 12 |
| Uncomfortable having friends                      | ZBI 13 |
| Patient expected you to be the only caregiver     | ZBI 14 |
| Feel financially stressed                         | ZBI 15 |
| Feel unable to take care of the patient much      | ZBI 16 |
| Sense of losing control over life                 | ZBI 17 |
| Wish to leave caring of the patient               | ZBI 18 |
| Feel uncertain of what to do                      | ZBI 19 |
| Feel should be doing more for the patient         | ZBI 20 |
| Feel could do better for the patient              | ZBI 21 |
| Feel burdened of caring                           | ZBI 22 |

**Table S5.** Descriptive statistics of the Brief Experience of Caregiving Inventory (BECI). N=384.

|                                                     | Mean (SD) [min-max] | Median (IQR) |
|-----------------------------------------------------|---------------------|--------------|
| Total score (SD) [min-max]                          | 32.0 (12.3) [1-60]  | 32.0 (18.0)  |
| Difficult Behaviours (items 14, 15, 16, 17, 18, 19) | 10.2 (5.7) [0-24]   | 10.0 (8.0)   |
| Positive Personal Experience (items 4, 5, 7, 12)    | 8.4 (3.1) [0-15]    | 9.0 (5.0)    |
| Problems with Services (items 2, 3, 6, 8, 11)       | 7.6 (4.8) [0-20]    | 7.0 (7.0)    |
| Stigma/Effects on Family (items 1, 9, 10, 13)       | 5.7 (3.6) [0-16]    | 5.0 (5.0)    |

**Table S6.** Brief Experience of Caregiving Inventory (BECI).

|                                                           |         |
|-----------------------------------------------------------|---------|
| Feeling unable to tell anyone about his illness           | BECI 1  |
| How mental health professionals do not take you seriously | BECI 2  |
| Dealing with psychiatrists                                | BECI 3  |
| I have become more confident dealing with others          | BECI 4  |
| I have become more understanding of others with problems  | BECI 5  |
| How to deal with mental health professionals              | BECI 6  |
| He/she is good company                                    | BECI 7  |
| How health professionals do not understand your situation | BECI 8  |
| How to explain his illness to others                      | BECI 9  |
| Others leaving home because of the effects of the illness | BECI 10 |
| How to make complaints about his care                     | BECI 11 |
| I have discovered strengths in myself                     | BECI 12 |
| The illness causing a family breakup                      | BECI 13 |
| (Patient being) Unpredictable                             | BECI 14 |
| (Patient being) Uncommunicative                           | BECI 15 |
| (Patient being) Not interested                            | BECI 16 |
| (Patient being) Irritable                                 | BECI 17 |
| (Patient being) Inconsiderate                             | BECI 18 |
| Patient behaving in a reckless way                        | BECI 19 |

**Table S7.** Pearson's correlations between scales (total scores). N=384.  $p$ -values < 0.001.

|      | CESD | ZBI  | BECI |
|------|------|------|------|
| CESD | —    | —    | —    |
| ZBI  | .638 | —    | —    |
| BECI | .512 | .717 | —    |

**Table S8.** Partial correlations matrix of network 1a (Fig. 1a). Boxes highlighted in blue indicate edges for which 95% bootstrap confidence intervals did not contain zero. Dark blue indicate edges between BECI/ZBI dimensions and total CES-D score (D).

|    | B1   | B2    | B3   | B4   | Z1   | Z2   | Z3   | Z4    | Z5   | D |
|----|------|-------|------|------|------|------|------|-------|------|---|
| B1 |      |       |      |      |      |      |      |       |      |   |
| B2 | 0    |       |      |      |      |      |      |       |      |   |
| B3 | 0.13 | 0.08  |      |      |      |      |      |       |      |   |
| B4 | 0.02 | 0.14  | 0.30 |      |      |      |      |       |      |   |
| Z1 | 0.33 | -0.02 | 0.10 | 0.04 |      |      |      |       |      |   |
| Z2 | 0.09 | 0     | 0    | 0.19 | 0.28 |      |      |       |      |   |
| Z3 | 0.07 | 0     | 0    | 0.10 | 0.13 | 0.19 |      |       |      |   |
| Z4 | 0.05 | 0     | 0.02 | 0    | 0.28 | 0.11 | 0.27 |       |      |   |
| Z5 | 0    | 0     | 0.10 | 0.02 | 0.17 | 0    | 0    | 0.004 |      |   |
| D  | 0.01 | -0.16 | 0.04 | 0.22 | 0.29 | 0.03 | 0    | 0     | 0.08 |   |

B1=Difficult Behaviours; B2=Positive Personal Experience; B3=Problems with Services; B4=Stigma/Effects on Family. Z1=Negative Emotion/Consequences; Z2=Interpersonal Relationships; Z3=Time Demand; Z4=Patient's Dependence; Self-accusation/Guilt. D=Depression (total CESD score).

**Fig S1.** Bootstrap confidence intervals (CIs) of estimated edge-weights in network 1a. The red line indicates the sample values and the grey area the bootstrap CIs. Each horizontal line represents one edge of the network, ordered from the edge with the highest weight to the edge with the lowest weight. In the case of ties (for instance, multiple edge-weights were estimated to be exactly 0), the mean of the *bootstrap* samples was used in ordering the edges. Boxes indicate the proportion of times parameters were estimated to be zero.

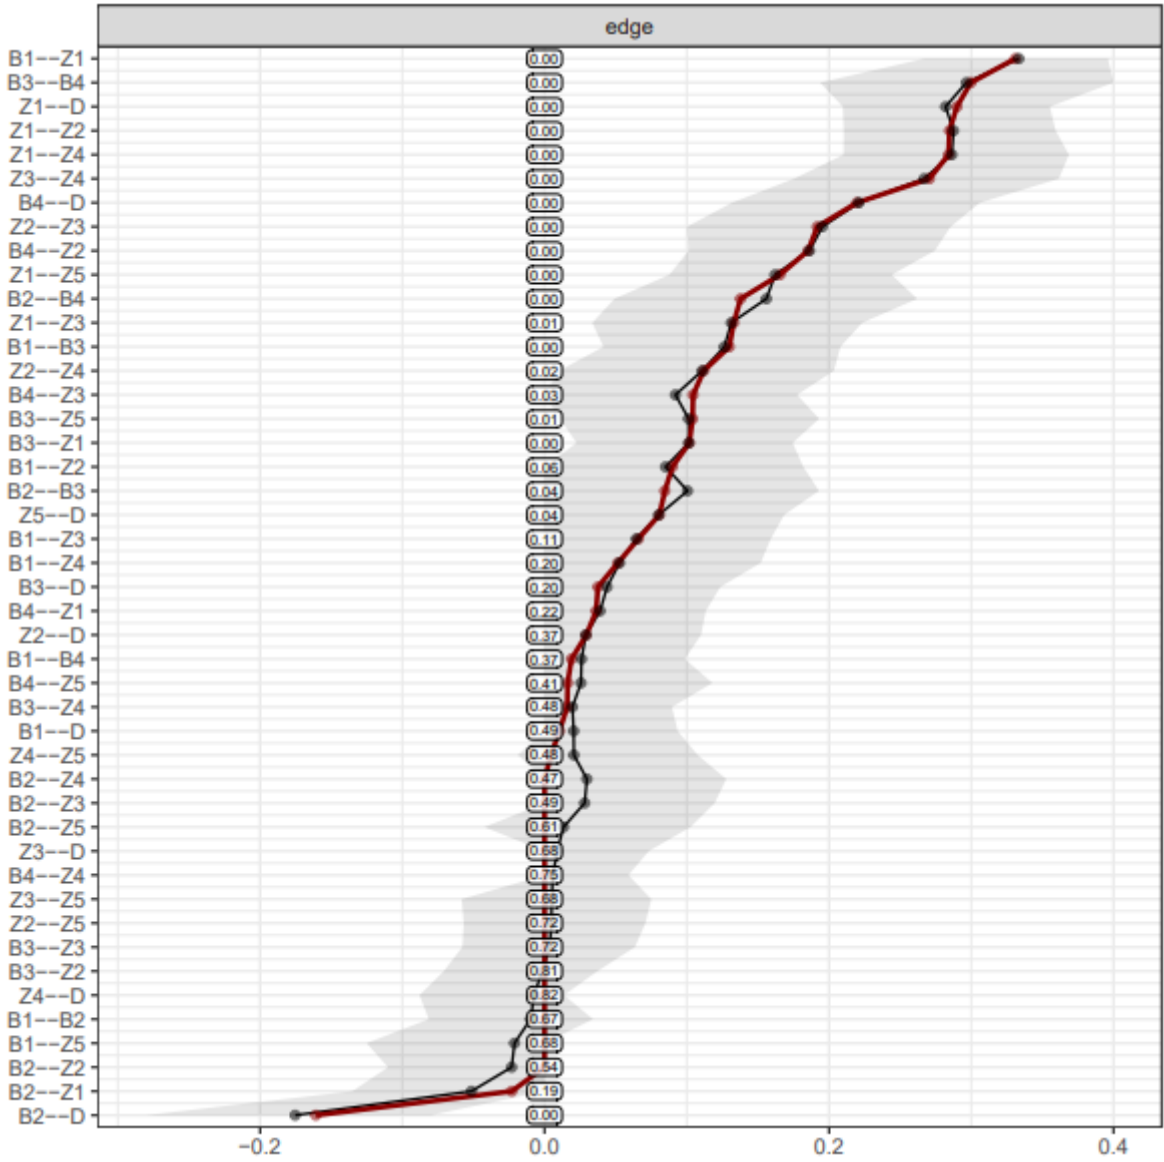

**Table S9.** Summary of bootstrap results for network 1a (only edges for which 95% bootstrap confidence intervals did not contain zero are reported: 18 edges over 45 estimated edges). Edges are ranked by absolute edge weight. Dark blue indicate edges between BECI/ZBI dimensions and total CES-D score (D). “prop0” indicates the proportion of times parameters were estimated to be zero.

| Edge   | Sample | Bootstrap results |          |          |       |
|--------|--------|-------------------|----------|----------|-------|
|        |        | Mean              | CI lower | CI upper | prop0 |
| B1--Z1 | 0.33   | 0.33              | 0.27     | 0.40     | 0     |
| B3--B4 | 0.30   | 0.30              | 0.20     | 0.40     | 0     |
| Z1--D  | 0.29   | 0.28              | 0.22     | 0.36     | 0     |
| Z1--Z2 | 0.28   | 0.29              | 0.21     | 0.36     | 0     |
| Z1--Z4 | 0.28   | 0.29              | 0.20     | 0.36     | 0     |
| Z3--Z4 | 0.27   | 0.27              | 0.17     | 0.37     | 0     |
| B4--D  | 0.22   | 0.22              | 0.13     | 0.31     | 0     |
| Z2--Z3 | 0.19   | 0.20              | 0.10     | 0.28     | 0     |
| B4--Z2 | 0.19   | 0.19              | 0.10     | 0.27     | 0     |
| Z1--Z5 | 0.17   | 0.16              | 0.08     | 0.25     | 0     |
| B2--D  | -0.16  | -0.18             | -0.26    | -0.06    | 0     |
| B2--B4 | 0.14   | 0.16              | 0.03     | 0.24     | 0.4   |
| Z1--Z3 | 0.13   | 0.13              | 0.04     | 0.23     | 0.6   |
| B1--B3 | 0.13   | 0.13              | 0.04     | 0.22     | 0.3   |
| Z2--Z4 | 0.11   | 0.11              | 0.02     | 0.21     | 1.6   |
| B4--Z3 | 0.10   | 0.09              | 0.02     | 0.19     | 3.3   |
| B3--Z5 | 0.10   | 0.10              | 0.01     | 0.20     | 1.3   |
| B3--Z1 | 0.10   | 0.10              | 0.02     | 0.18     | 0.3   |

B1=Difficult Behaviours; B2=Positive Personal Experience; B3=Problems with Services; B4=Stigma/Effects on Family. Z1=Negative Emotion/Consequences; Z2=Interpersonal Relationships; Z3=Time Demand; Z4=Patient’s Dependence; Self-accusation/Guilt. D=Depression (total CESD score).

**Fig. S2.** Average correlations between centrality indices (strength) of networks sampled with persons dropped and the original sample (network 1a). The line indicates the means and areas indicate the range from the 2.5<sup>th</sup> to the 97.5<sup>th</sup> quantiles. Maximum drop proportions to retain correlation of 0.7 in at least 95% of the samples: 0.75 (maximum proportion tested).

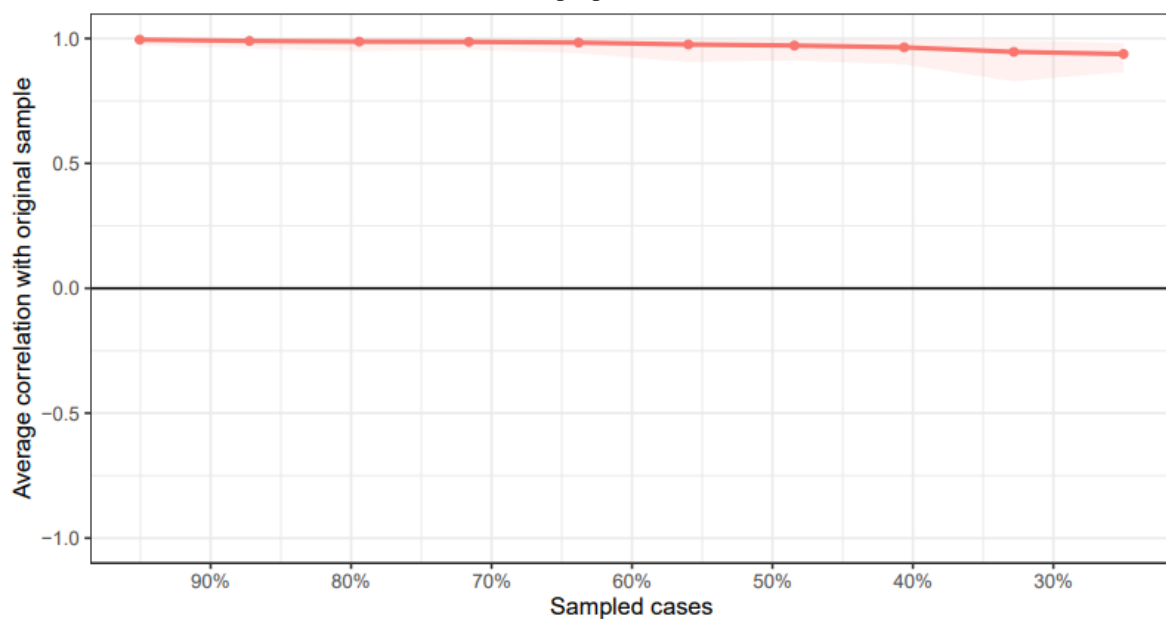

**Table S10.** Partial correlations matrix of network 1b (Fig. 1b). Boxes highlighted in blue indicate edges for which 95% bootstrap confidence intervals did not contain zero. Dark blue indicate edges between BECI/ZBI dimensions and CES-D symptoms.

|     | B1   | B2     | B3    | B4    | Z1    | Z2    | Z3   | Z4    | Z5   | D1   | D2   | D3    | D4    | D5    | D6   | D7   | D8   | D9   | D10  | D11  | D12  | D13   | D14  | D15 | D17  | D18  | D20 |
|-----|------|--------|-------|-------|-------|-------|------|-------|------|------|------|-------|-------|-------|------|------|------|------|------|------|------|-------|------|-----|------|------|-----|
| B1  |      |        |       |       |       |       |      |       |      |      |      |       |       |       |      |      |      |      |      |      |      |       |      |     |      |      |     |
| B2  | 0    |        |       |       |       |       |      |       |      |      |      |       |       |       |      |      |      |      |      |      |      |       |      |     |      |      |     |
| B3  | 0.12 | 0.07   |       |       |       |       |      |       |      |      |      |       |       |       |      |      |      |      |      |      |      |       |      |     |      |      |     |
| B4  | 0.02 | 0.11   | 0.29  |       |       |       |      |       |      |      |      |       |       |       |      |      |      |      |      |      |      |       |      |     |      |      |     |
| Z1  | 0.30 | 0      | 0.10  | 0.06  |       |       |      |       |      |      |      |       |       |       |      |      |      |      |      |      |      |       |      |     |      |      |     |
| Z2  | 0.09 | 0      | 0     | 0.18  | 0.27  |       |      |       |      |      |      |       |       |       |      |      |      |      |      |      |      |       |      |     |      |      |     |
| Z3  | 0.05 | 0      | 0     | 0.09  | 0.12  | 0.18  |      |       |      |      |      |       |       |       |      |      |      |      |      |      |      |       |      |     |      |      |     |
| Z4  | 0.06 | 0      | 0.02  | 0     | 0.28  | 0.12  | 0.26 |       |      |      |      |       |       |       |      |      |      |      |      |      |      |       |      |     |      |      |     |
| Z5  | 0    | 0      | 0.10  | 0.01  | 0.15  | 0     | 0    | 0.004 |      |      |      |       |       |       |      |      |      |      |      |      |      |       |      |     |      |      |     |
| D1  | 0.13 | 0      | 0     | 0     | 0.05  | 0     | 0.08 | 0     | 0    |      |      |       |       |       |      |      |      |      |      |      |      |       |      |     |      |      |     |
| D2  | 0.03 | 0      | 0     | 0     | 0     | 0     | 0    | 0     | 0    | 0.01 |      |       |       |       |      |      |      |      |      |      |      |       |      |     |      |      |     |
| D3  | 0    | 0      | 0     | 0     | 0     | 0     | 0    | 0     | 0    | 0.10 | 0.09 |       |       |       |      |      |      |      |      |      |      |       |      |     |      |      |     |
| D4  | 0    | -0.10  | 0     | 0     | 0     | 0     | 0    | -0.01 | 0    | 0    | 0    | 0.09  |       |       |      |      |      |      |      |      |      |       |      |     |      |      |     |
| D5  | 0    | 0      | 0.001 | 0.05  | 0.02  | 0     | 0    | 0     | 0.03 | 0.09 | 0.03 | 0     | 0     |       |      |      |      |      |      |      |      |       |      |     |      |      |     |
| D6  | 0    | 0      | 0     | 0     | 0.04  | 0     | 0    | 0     | 0    | 0.04 | 0.01 | 0.32  | 0.04  | 0.03  |      |      |      |      |      |      |      |       |      |     |      |      |     |
| D7  | 0    | 0      | 0     | 0.005 | 0.07  | 0.003 | 0    | 0     | 0    | 0.04 | 0.04 | 0.01  | 0     | 0.13  | 0.10 |      |      |      |      |      |      |       |      |     |      |      |     |
| D8  | 0    | -0.09  | 0     | 0.01  | 0.03  | 0.02  | 0    | 0     | 0    | 0    | 0    | 0.04  | 0.04  | 0.001 | 0.02 | 0    |      |      |      |      |      |       |      |     |      |      |     |
| D9  | 0    | -0.04  | 0     | 0.003 | 0.12  | 0     | 0    | 0     | 0.06 | 0    | 0    | 0.07  | 0.05  | 0     | 0.04 | 0.01 | 0.05 |      |      |      |      |       |      |     |      |      |     |
| D10 | 0    | 0      | 0     | 0     | 0.04  | 0     | 0    | 0     | 0    | 0    | 0.01 | 0     | 0     | 0.02  | 0.08 | 0.01 | 0.01 | 0.14 |      |      |      |       |      |     |      |      |     |
| D11 | 0    | 0      | 0     | 0.04  | 0     | 0     | 0.03 | 0     | 0    | 0    | 0.06 | 0     | 0     | 0.03  | 0.05 | 0.11 | 0.01 | 0    | 0.12 |      |      |       |      |     |      |      |     |
| D12 | 0    | -0.13  | 0.01  | 0     | 0.11  | 0.02  | 0    | 0     | 0.01 | 0.01 | 0.01 | 0     | 0.11  | 0     | 0    | 0    | 0.36 | 0.05 | 0    | 0    |      |       |      |     |      |      |     |
| D13 | 0    | 0      | 0     | 0     | 0     | 0     | 0    | 0     | 0    | 0.02 | 0.08 | 0.01  | 0.04  | 0     | 0    | 0.01 | 0    | 0.02 | 0.05 | 0.03 | 0.01 |       |      |     |      |      |     |
| D14 | 0    | 0      | 0.03  | 0.07  | 0.03  | 0.04  | 0.03 | 0     | 0.02 | 0    | 0.02 | 0.03  | 0.004 | 0.08  | 0.08 | 0.06 | 0    | 0.02 | 0    | 0.00 | 0.01 | 0.28  |      |     |      |      |     |
| D15 | 0    | 0      | 0.002 | 0.07  | 0     | 0     | 0.02 | 0     | 0    | 0.08 | 0    | 0.12  | 0     | 0     | 0    | 0.03 | 0    | 0    | 0.07 | 0    | 0    | 0.005 | 0.12 |     |      |      |     |
| D17 | 0    | 0      | 0.04  | 0     | 0     | 0     | 0    | 0     | 0    | 0    | 0.03 | 0.08  | 0.07  | 0     | 0.09 | 0    | 0    | 0.05 | 0    | 0    | 0    | 0     | 0.02 | 0   |      |      |     |
| D18 | 0    | 0      | 0     | 0.09  | 0.003 | 0     | 0    | 0     | 0.04 | 0    | 0    | 0.13  | 0     | 0     | 0.22 | 0.06 | 0    | 0.07 | 0.08 | 0.05 | 0.08 | 0     | 0.06 | 0   | 0.28 |      |     |
| D20 | 0    | -0.004 | 0     | 0     | 0     | 0     | 0    | 0     | 0.01 | 0.02 | 0.14 | 0.004 | 0.01  | 0.19  | 0.13 | 0.31 | 0.08 | 0.01 | 0.01 | 0.04 | 0.11 | 0.10  | 0    | 0   | 0    | 0.08 |     |

B1=Difficult Behaviours; B2=Positive Personal Experience; B3=Problems with Services; B4=Stigma/Effects on Family. Z1=Negative Emotion/Consequences; Z2=Interpersonal Relationships; Z3=Time Demand; Z4=Patient's Dependence; Self-accusation/Guilt. D1=feeling bothered; D2=appetite changes; D3=feeling blue; D4=lack of feeling good; D5=difficulty with concentrating; D6=depressed mood; D7=everything was an effort; D8=hopelessness; D9=feeling of failure; D10=fearful; D11=sleep disturbances; D12=lack of happiness; D13=talking less; D14=lonely; D15=people unfriendly; D17=crying. D18=sadness; D20=inability to get going.



**Fig S3.** Bootstrap confidence intervals (CIs) of estimated edge-weights in network 1b. The red line indicates the sample values and the grey area the bootstrap CIs. Each horizontal line represents one edge of the network, ordered from the edge with the highest weight to the edge with the lowest weight. In the case of ties (for instance, multiple edge-weights were estimated to be exactly 0), the mean of the *bootstrap* samples was used in ordering the edges. The y-axis labels have been removed to avoid cluttering.

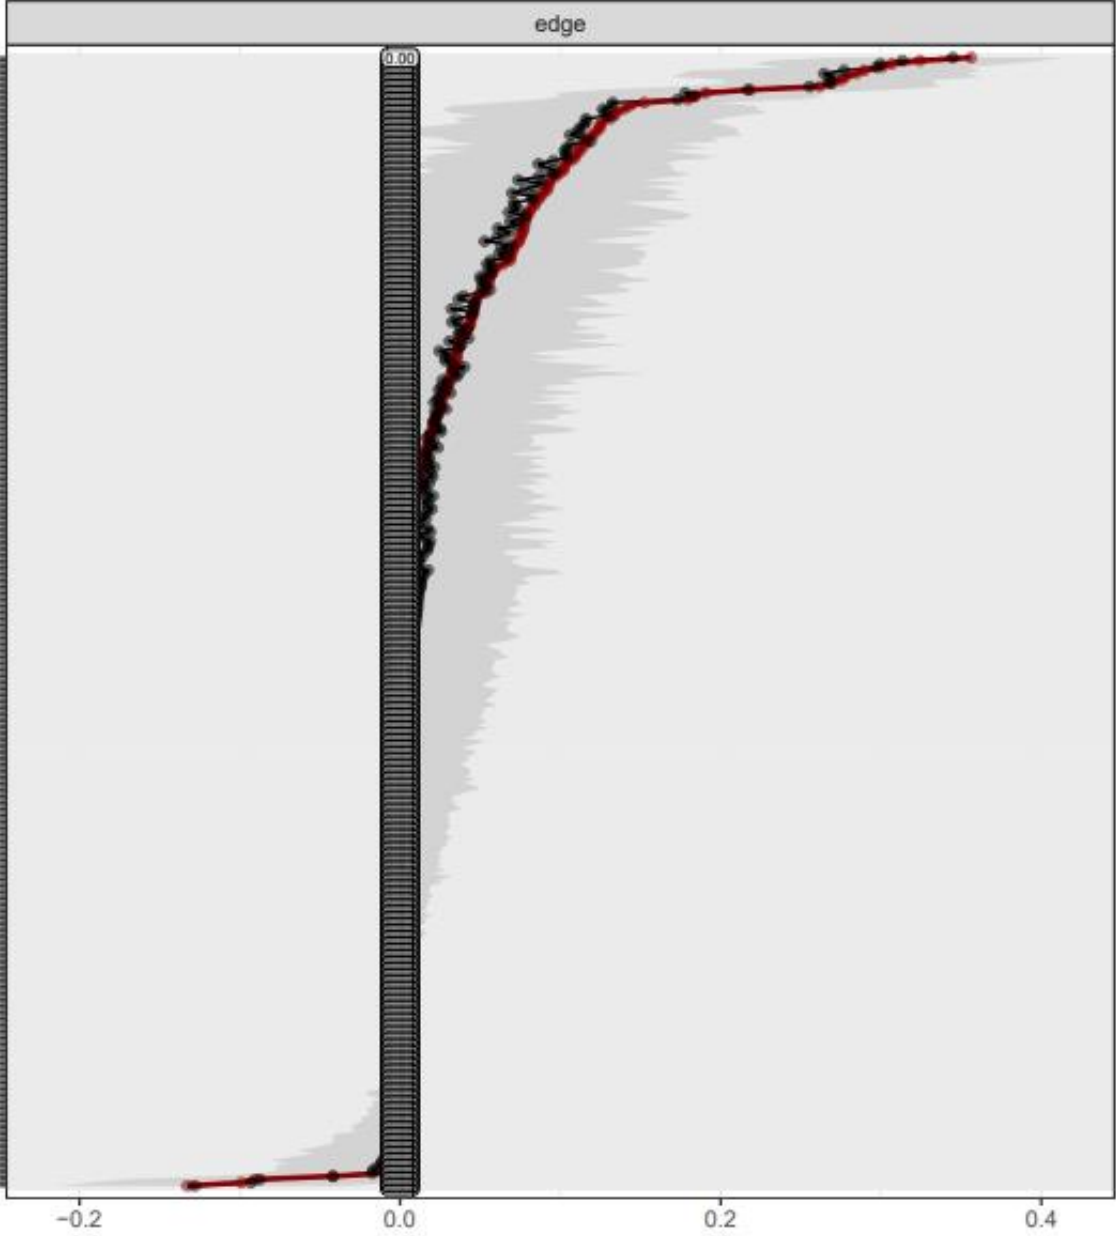

**Table S11.** Summary of bootstrap results for network 1b (only edges for which 95% bootstrap confidence intervals did not contain zero are reported: 50 edges over 352 estimated edges). Edges are ranked by absolute edge weight. Dark blue indicate edges between BECI/ZBI dimensions and CES-D items. “prop0” indicates the proportion of times parameters were estimated to be zero.

| Edge     | Sample | Bootstrap results |          |          | prop0 |
|----------|--------|-------------------|----------|----------|-------|
|          |        | Mean              | CI lower | CI upper |       |
| D8--D12  | 0.36   | 0.34              | 0.28     | 0.43     | 0     |
| D3--D6   | 0.32   | 0.31              | 0.24     | 0.41     | 0     |
| D7--D20  | 0.31   | 0.30              | 0.23     | 0.39     | 0     |
| B1--Z1   | 0.30   | 0.30              | 0.24     | 0.36     | 0     |
| B3--B4   | 0.29   | 0.28              | 0.20     | 0.38     | 0     |
| D13--D14 | 0.28   | 0.26              | 0.20     | 0.37     | 0     |
| D17--D18 | 0.28   | 0.27              | 0.18     | 0.38     | 0     |
| Z1--Z4   | 0.28   | 0.27              | 0.21     | 0.34     | 0     |
| Z1--Z2   | 0.27   | 0.27              | 0.20     | 0.34     | 0     |
| Z3--Z4   | 0.26   | 0.26              | 0.18     | 0.35     | 0     |
| D6--D18  | 0.22   | 0.22              | 0.13     | 0.31     | 0     |
| D5--D20  | 0.19   | 0.18              | 0.11     | 0.27     | 0     |
| Z2--Z3   | 0.18   | 0.18              | 0.10     | 0.27     | 0     |
| B4--Z2   | 0.18   | 0.17              | 0.10     | 0.26     | 0     |
| Z1--Z5   | 0.15   | 0.13              | 0.08     | 0.22     | 0     |
| D2--D20  | 0.14   | 0.13              | 0.05     | 0.24     | 0.2   |
| D9--D10  | 0.14   | 0.13              | 0.04     | 0.24     | 0.5   |
| D5--D7   | 0.13   | 0.13              | 0.03     | 0.24     | 0.8   |
| D3--D18  | 0.13   | 0.13              | 0.05     | 0.22     | 0.2   |
| B2--D12  | -0.13  | -0.13             | -0.22    | -0.04    | 0.3   |
| B1--D1   | 0.13   | 0.12              | 0.05     | 0.22     | 0.4   |
| D6--D20  | 0.13   | 0.12              | 0.05     | 0.20     | 0.2   |
| B1--B3   | 0.12   | 0.11              | 0.04     | 0.21     | 0.6   |
| D14--D15 | 0.12   | 0.11              | 0.02     | 0.23     | 2.2   |
| D10--D11 | 0.12   | 0.11              | 0.02     | 0.23     | 1.7   |
| D3--D15  | 0.12   | 0.11              | 0.01     | 0.23     | 3.1   |
| Z2--Z4   | 0.12   | 0.11              | 0.03     | 0.20     | 0.5   |
| Z1--Z3   | 0.12   | 0.12              | 0.03     | 0.20     | 0.2   |
| Z1--D9   | 0.12   | 0.11              | 0.05     | 0.18     | 0.1   |
| D7--D11  | 0.11   | 0.10              | 0.02     | 0.20     | 1.4   |
| Z1--D12  | 0.11   | 0.10              | 0.05     | 0.18     | 0.1   |
| B2--B4   | 0.11   | 0.10              | 0.03     | 0.19     | 0.9   |
| D4--D12  | 0.11   | 0.10              | 0.02     | 0.20     | 1.8   |
| D12--D20 | 0.11   | 0.10              | 0.03     | 0.18     | 0.9   |
| D13--D20 | 0.10   | 0.09              | 0.02     | 0.18     | 1.7   |
| D1--D3   | 0.10   | 0.09              | 0.02     | 0.18     | 1.6   |
| B3--Z1   | 0.10   | 0.10              | 0.03     | 0.18     | 0.4   |
| D6--D7   | 0.10   | 0.10              | 0.01     | 0.18     | 1.3   |
| B2--D4   | -0.10  | -0.09             | -0.20    | -0.002   | 4.2   |
| B3--Z5   | 0.10   | 0.09              | 0.01     | 0.18     | 2.6   |
| B4--D18  | 0.09   | 0.07              | 0.02     | 0.17     | 3.1   |
| B1--Z2   | 0.09   | 0.09              | 0.005    | 0.18     | 2.2   |
| D3--D4   | 0.09   | 0.08              | 0.02     | 0.16     | 1.4   |
| B2--D8   | -0.09  | -0.09             | -0.18    | -0.003   | 3     |
| B4--Z3   | 0.09   | 0.08              | 0.01     | 0.17     | 2.4   |
| D12--D18 | 0.08   | 0.07              | 0.01     | 0.15     | 3.1   |
| D6--D14  | 0.08   | 0.07              | 0.01     | 0.16     | 4.2   |
| D8--D20  | 0.08   | 0.06              | 0.01     | 0.15     | 5.9   |
| B4--D15  | 0.07   | 0.06              | 0.003    | 0.15     | 6.6   |
| Z1--D7   | 0.07   | 0.05              | 0.01     | 0.13     | 5     |

B1=Difficult Behaviours; B2=Positive Personal Experience; B3=Problems with Services; B4=Stigma/Effects on Family. Z1=Negative Emotion/Consequences; Z2=Interpersonal Relationships; Z3=Time Demand; Z4=Patient’s Dependence; Self-accusation/Guilt. D1=feeling bothered; D2=appetite changes; D3=feeling blue; D4=lack of feeling good; D5=difficulty with concentrating; D6=depressed mood; D7=everything was an effort; D8=hopelessness; D9=feeling of failure; D10=fearful; D11=sleep disturbances; D12=lack of happiness; D13=talking less; D14= lonely; D15=people unfriendly; D17=crying. D18=sadness; D20=inability to get going.

**Fig. S4.** Average correlations between centrality indices (strength) of networks sampled with persons dropped and the original sample (network 1b). The line indicates the means and areas indicate the range from the 2.5<sup>th</sup> to the 97.5<sup>th</sup> quantiles. Maximum drop proportions to retain correlation of 0.7 in at least 95% of the samples: 0.594.

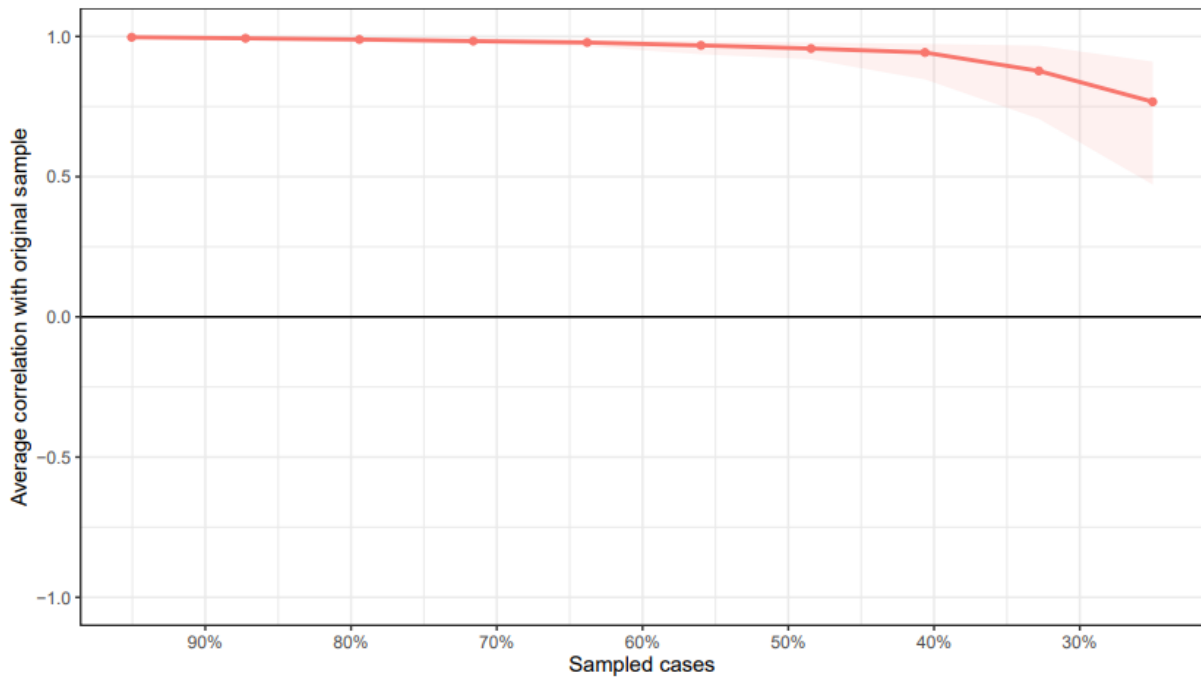

**Table S12.** Partial correlations matrix of network 2a (Fig. 2a). Boxes highlighted in blue indicate edges for which 95% bootstrap confidence interval did not contain zero. Dark blue indicate edges between ZBI items (Negative Emotion/Consequences dimension) and total CES-D score (D).

|     | Z4   | Z5   | Z7   | Z9   | Z10  | Z15  | Z16  | Z17  | Z18  | Z19  | D |
|-----|------|------|------|------|------|------|------|------|------|------|---|
| Z4  |      |      |      |      |      |      |      |      |      |      |   |
| Z5  | 0.32 |      |      |      |      |      |      |      |      |      |   |
| Z7  | 0.11 | 0    |      |      |      |      |      |      |      |      |   |
| Z9  | 0.18 | 0.37 | 0    |      |      |      |      |      |      |      |   |
| Z10 | 0    | 0    | 0    | 0.18 |      |      |      |      |      |      |   |
| Z15 | 0    | 0    | 0.06 | 0    | 0.13 |      |      |      |      |      |   |
| Z16 | 0    | 0.02 | 0.11 | 0    | 0.06 | 0.19 |      |      |      |      |   |
| Z17 | 0.15 | 0.02 | 0.14 | 0.01 | 0.30 | 0.06 | 0.16 |      |      |      |   |
| Z18 | 0.09 | 0.03 | 0    | 0.10 | 0.07 | 0.02 | 0.23 | 0.04 |      |      |   |
| Z19 | 0.10 | 0.06 | 0.15 | 0.07 | 0.07 | 0    | 0.06 | 0.00 | 0.22 |      |   |
| D   | 0    | 0    | 0.11 | 0.17 | 0.19 | 0.11 | 0.06 | 0.17 | 0    | 0.09 |   |

Z4=Embarrassed of patient's behaviour; Z5=Angry around the patient Z7=Afraid of patient's future; Z9=Strained around the patient; Z10=Health affected by caregiving; Z15=Financially stressed; Z16=Unable to take care of the patient much; Z17=Sense of losing control over life; Z18=Wish to leave caring of the patient; Z19=Feel uncertain of what to do. D=Depression (total CESD score).

**Fig S5.** Bootstrap confidence intervals (CIs) of estimated edge-weights in network 2a. The red line indicates the sample values and the grey area the bootstrap CIs. Each horizontal line represents one edge of the network, ordered from the edge with the highest weight to the edge with the lowest weight. In the case of ties (for instance, multiple edge-weights were estimated to be exactly 0), the mean of the *bootstrap* samples was used in ordering the edges. Boxes indicate the proportion of times parameters were estimated to be zero.

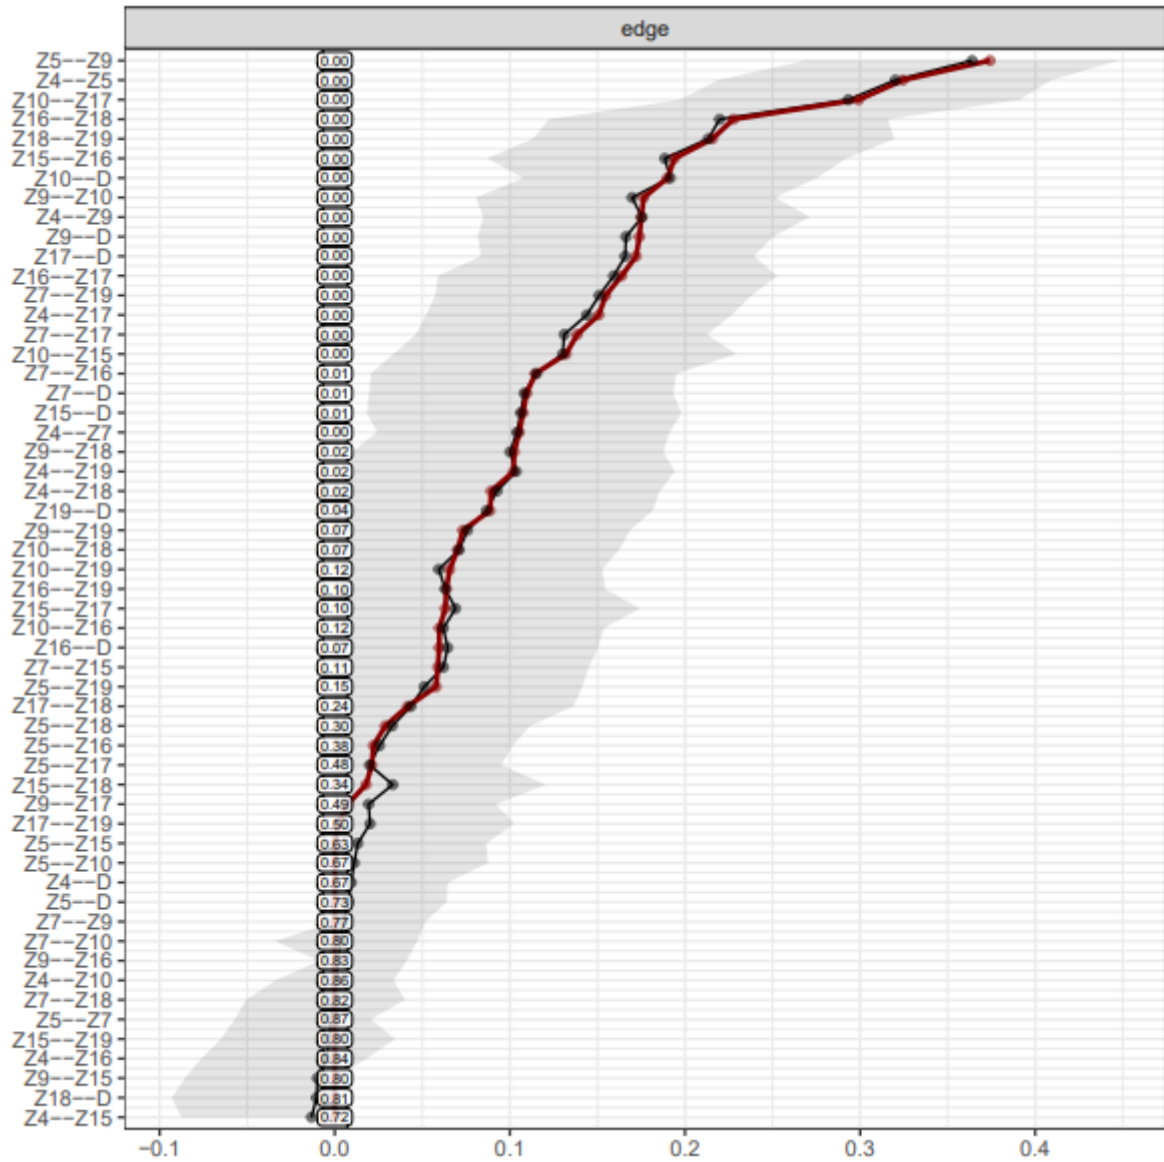

**Table S13.** Summary of bootstrap results for network 2a (only edges for which 95% bootstrap confidence interval did not contain zero are reported: 22 edges over 55 estimated edges). Edges are ranked by absolute edge weight. Dark blue indicate edges between ZBI and CES-D items. “prop0” indicates the proportion of times parameters were estimated to be zero.

| Edge     | Sample | Bootstrap results |          |          |       |
|----------|--------|-------------------|----------|----------|-------|
|          |        | Mean              | CI lower | CI upper | prop0 |
| Z5--Z9   | 0.37   | 0.36              | 0.28     | 0.46     | 0     |
| Z4--Z5   | 0.32   | 0.32              | 0.23     | 0.42     | 0     |
| Z10--Z17 | 0.30   | 0.29              | 0.20     | 0.40     | 0     |
| Z16--Z18 | 0.23   | 0.22              | 0.13     | 0.33     | 0     |
| Z18--Z19 | 0.22   | 0.21              | 0.11     | 0.32     | 0     |
| Z10--D   | 0.19   | 0.19              | 0.10     | 0.28     | 0     |
| Z17--D   | 0.17   | 0.17              | 0.09     | 0.25     | 0     |
| Z9--Z10  | 0.18   | 0.17              | 0.09     | 0.26     | 0     |
| Z15--Z16 | 0.19   | 0.19              | 0.09     | 0.30     | 0.1   |
| Z9--D    | 0.17   | 0.17              | 0.09     | 0.26     | 0     |
| Z4--Z9   | 0.18   | 0.18              | 0.08     | 0.27     | 0     |
| Z7--Z19  | 0.15   | 0.15              | 0.06     | 0.25     | 0     |
| Z16--Z17 | 0.16   | 0.16              | 0.06     | 0.26     | 0.1   |
| Z4--Z17  | 0.15   | 0.14              | 0.06     | 0.24     | 0     |
| Z7--Z17  | 0.14   | 0.13              | 0.06     | 0.22     | 0.1   |
| Z10--Z15 | 0.13   | 0.13              | 0.03     | 0.23     | 0.2   |
| Z7--Z16  | 0.11   | 0.12              | 0.02     | 0.21     | 0.9   |
| Z7--D    | 0.11   | 0.11              | 0.02     | 0.20     | 0.6   |
| Z4--Z7   | 0.11   | 0.10              | 0.02     | 0.19     | 0.3   |
| Z15--D   | 0.11   | 0.11              | 0.02     | 0.20     | 1.3   |
| Z9--Z18  | 0.10   | 0.10              | 0.01     | 0.19     | 1.6   |
| Z4--Z19  | 0.10   | 0.10              | 0.01     | 0.19     | 1.7   |

Z4=Embarrassed of patient’s behaviour; Z5=Angry around the patient Z7=Afraid of patient’s future; Z9=Strained around the patient; Z10=Health affected by caregiving; Z15=Financially stressed; Z16=Unable to take care of the patient much; Z17=Sense of losing control over life; Z18=Wish to leave caring of the patient; Z19=Feel uncertain of what to do. D=Depression (total CESD score).

**Fig. S6.** Average correlations between centrality indices (strength) of networks sampled with persons dropped and the original sample (network 2a). The line indicates the means and areas indicate the range from the 2.5<sup>th</sup> to the 97.5<sup>th</sup> quantiles. Maximum drop proportions to retain correlation of 0.7 in at least 95% of the samples: 0.594.

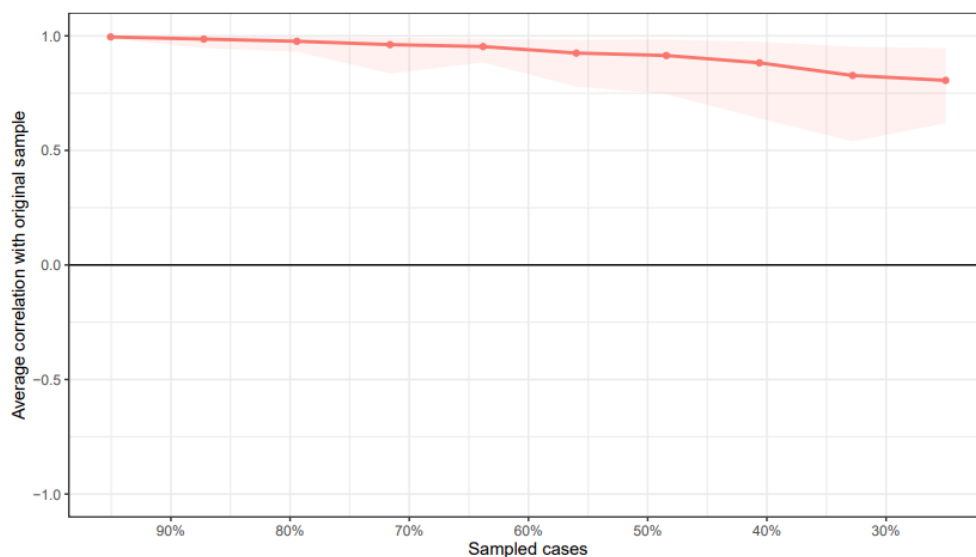

**Table S14.** Partial correlations matrix of network 2b (Fig. 2b). Boxes highlighted in blue indicate edges for which 95% bootstrap confidence intervals did not contain zero. Dark blue indicate edges between ZBI items (Negative Emotion/Consequences dimension) and CESD items.

|     | Z4   | Z5   | Z7    | Z9   | Z10   | Z15   | Z16   | Z17  | Z18   | Z19  | D1   | D2    | D3    | D4    | D5   | D6   | D7    | D8    | D9   | D10  | D11  | D12   | D13  | D14  | D15  | D17  | D18  | D20 |
|-----|------|------|-------|------|-------|-------|-------|------|-------|------|------|-------|-------|-------|------|------|-------|-------|------|------|------|-------|------|------|------|------|------|-----|
| Z4  |      |      |       |      |       |       |       |      |       |      |      |       |       |       |      |      |       |       |      |      |      |       |      |      |      |      |      |     |
| Z5  | 0.31 |      |       |      |       |       |       |      |       |      |      |       |       |       |      |      |       |       |      |      |      |       |      |      |      |      |      |     |
| Z7  | 0.10 | 0    |       |      |       |       |       |      |       |      |      |       |       |       |      |      |       |       |      |      |      |       |      |      |      |      |      |     |
| Z9  | 0.17 | 0.35 | 0     |      |       |       |       |      |       |      |      |       |       |       |      |      |       |       |      |      |      |       |      |      |      |      |      |     |
| Z10 | 0    | 0    | 0     | 0.17 |       |       |       |      |       |      |      |       |       |       |      |      |       |       |      |      |      |       |      |      |      |      |      |     |
| Z15 | 0    | 0    | 0.05  | 0    | 0.11  |       |       |      |       |      |      |       |       |       |      |      |       |       |      |      |      |       |      |      |      |      |      |     |
| Z16 | 0    | 0.01 | 0.11  | 0    | 0.05  | 0.18  |       |      |       |      |      |       |       |       |      |      |       |       |      |      |      |       |      |      |      |      |      |     |
| Z17 | 0.14 | 0.01 | 0.12  | 0.02 | 0.28  | 0.05  | 0.15  |      |       |      |      |       |       |       |      |      |       |       |      |      |      |       |      |      |      |      |      |     |
| Z18 | 0.09 | 0.02 | 0     | 0.10 | 0.07  | 0.01  | 0.22  | 0.04 |       |      |      |       |       |       |      |      |       |       |      |      |      |       |      |      |      |      |      |     |
| Z19 | 0.09 | 0.05 | 0.15  | 0.08 | 0.06  | 0     | 0.06  | 0    | 0.21  |      |      |       |       |       |      |      |       |       |      |      |      |       |      |      |      |      |      |     |
| D1  | 0.03 | 0.10 | 0     | 0.03 | 0.001 | 0     | 0     | 0.03 | 0.06  | 0.02 |      |       |       |       |      |      |       |       |      |      |      |       |      |      |      |      |      |     |
| D2  | 0    | 0    | 0     | 0    | 0.01  | 0     | 0     | 0    | 0     | 0    | 0.02 |       |       |       |      |      |       |       |      |      |      |       |      |      |      |      |      |     |
| D3  | 0    | 0    | 0     | 0    | 0     | 0     | 0     | 0    | 0     | 0    | 0.10 | 0.09  |       |       |      |      |       |       |      |      |      |       |      |      |      |      |      |     |
| D4  | 0    | 0    | -0.05 | 0    | 0     | 0     | 0     | 0    | 0     | 0    | 0    | 0     | 0.09  |       |      |      |       |       |      |      |      |       |      |      |      |      |      |     |
| D5  | 0    | 0    | 0     | 0.03 | 0.05  | 0.01  | 2E-04 | 0    | 0     | 0    | 0.10 | 0.03  | 0     | 0     |      |      |       |       |      |      |      |       |      |      |      |      |      |     |
| D6  | 0    | 0    | 0.02  | 0    | 0.07  | 0     | 0     | 0.03 | 0     | 0    | 0.04 | 0.004 | 0.33  | 0.04  | 0.02 |      |       |       |      |      |      |       |      |      |      |      |      |     |
| D7  | 0    | 0    | 0     | 0.02 | 0.10  | 0.04  | 0.02  | 0.01 | 0     | 0    | 0.04 | 0.04  | 0.01  | 0     | 0.13 | 0.09 |       |       |      |      |      |       |      |      |      |      |      |     |
| D8  | 0    | 0    | 0.08  | 0    | 0     | 0     | 0     | 0.12 | 0     | 0.01 | 0    | 0     | 0.03  | 0.05  | 0    | 0    | 0     |       |      |      |      |       |      |      |      |      |      |     |
| D9  | 0.02 | 0.01 | 0     | 0    | 0     | 0.07  | 0.002 | 0.09 | 0     | 0.10 | 0    | 0     | 0.07  | 0.06  | 0    | 0.03 | 0.004 | 0.03  |      |      |      |       |      |      |      |      |      |     |
| D10 | 0    | 0    | 0     | 0.08 | 0     | 0.002 | 0     | 0    | 0     | 0    | 0    | 0.01  | 0     | 0     | 0.02 | 0.07 | 0.01  | 0.003 | 0.14 |      |      |       |      |      |      |      |      |     |
| D11 | 0    | 0    | 0.01  | 0.03 | 0.01  | 0.04  | 0     | 0    | 0     | 0    | 0    | 0.06  | 0     | 0     | 0.03 | 0.05 | 0.11  | 0.005 | 0    | 0.12 |      |       |      |      |      |      |      |     |
| D12 | 0    | 0.01 | 0     | 0.07 | 0.02  | 0     | 0.08  | 0.02 | 0     | 0.03 | 0.01 | 0.02  | 0     | 0.13  | 0    | 0    | 0     | 0.36  | 0.06 | 0    | 0    |       |      |      |      |      |      |     |
| D13 | 0.01 | 0    | 0     | 0    | 0     | 0     | 0     | 0    | 0     | 0    | 0.03 | 0.08  | 0.01  | 0.05  | 0    | 0    | 0.01  | 0     | 0.01 | 0.05 | 0.03 | 0.01  |      |      |      |      |      |     |
| D14 | 0    | 0    | 0     | 0    | 0.05  | 0.06  | 0     | 0.07 | 0     | 0.03 | 0    | 0.02  | 0.03  | 0.003 | 0.09 | 0.08 | 0.06  | 0     | 0.01 | 0    | 0.01 | 0.004 | 0.29 |      |      |      |      |     |
| D15 | 0.01 | 0    | 0     | 0    | 0     | 0.06  | 0     | 0    | 0     | 0    | 0.09 | 0     | 0.13  | 0     | 0    | 0    | 0.03  | 0     | 0    | 0.07 | 0    | 0     | 0.01 | 0.14 |      |      |      |     |
| D17 | 0    | 0    | 0     | 0    | 0.01  | 0     | 0     | 0    | 0     | 0.02 | 0    | 0.03  | 0.08  | 0.07  | 0    | 0.08 | 0     | -0.01 | 0.04 | 0    | 0    | 0     | 0    | 0    | 0.02 | 0    |      |     |
| D18 | 0    | 0    | 0.09  | 0.02 | 0     | 0     | 0.01  | 0    | 0     | 0    | 0    | 0     | 0.13  | 0     | 0    | 0.22 | 0.06  | 0     | 0.07 | 0.07 | 0.05 | 0.08  | 0    | 0.07 | 0    | 0.28 |      |     |
| D20 | 0    | 0    | 0     | 0    | 0     | 0     | 0.02  | 0    | -0.02 | 0    | 0.02 | 0.14  | 0.003 | 0.01  | 0.19 | 0.13 | 0.31  | 0.07  | 0.01 | 0.01 | 0.04 | 0.11  | 0.10 | 0    | 0    | 0    | 0.08 |     |

Z4=Embarrassed of patient's behaviour; Z5=Angry around the patient Z7=Afraid of patient's future; Z9=Strained around the patient; Z10=Health affected by caregiving; Z15=Financially stressed; Z16=Unable to take care of the patient much; Z17=Sense of losing control over life; Z18=Wish to leave caring of the patient; Z19=Feel uncertain of what to do. D1=feeling bothered; D2=appetite changes; D3=feeling blue; D4=lack of feeling good; D5=difficulty with concentrating; D6=depressed mood; D7=everything was an effort; D8=hopelessness; D9=feeling of failure; D10=fearful; D11=sleep disturbances; D12=lack of happiness; D13=talking less; D14=lone; D15=people unfriendly; D17=crying. D18=sadness; D20=inability to get going.

**Fig S7.** Bootstrap confidence intervals (CIs) of estimated edge-weights in network 2b. The red line indicates the sample values and the grey area the bootstrap CIs. Each horizontal line represents one edge of the network, ordered from the edge with the highest weight to the edge with the lowest weight. In the case of ties (for instance, multiple edge-weights were estimated to be exactly 0), the mean of the *bootstrap* samples was used in ordering the edges. The y-axis labels have been removed to avoid cluttering.

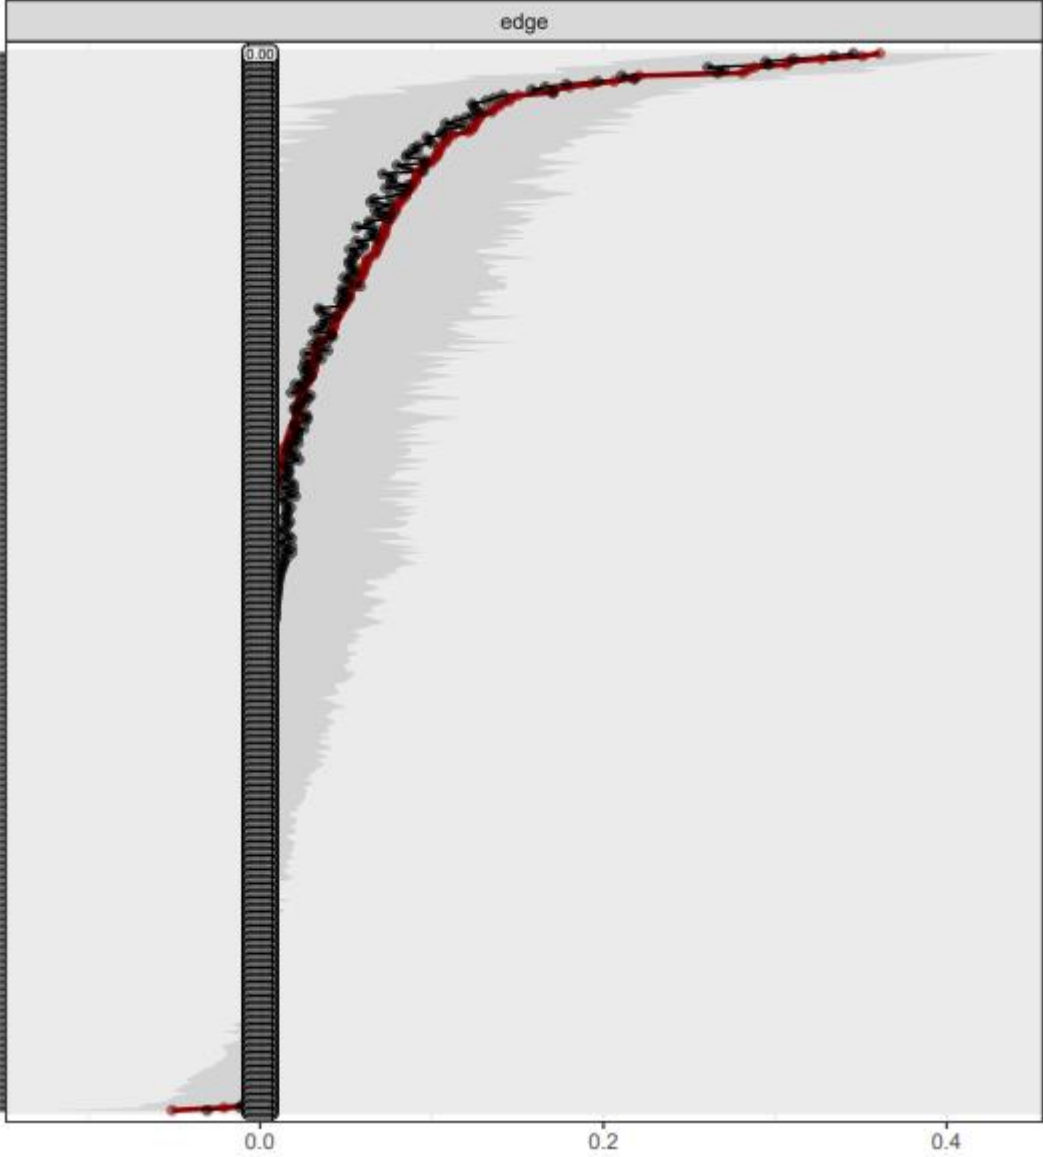

**Table S15.** Summary of bootstrap results for network 2b (only edges for which 95% bootstrap confidence interval did not contain zero are reported: 52 edges over 378 estimated edges). Edges are ranked by absolute edge weight. Dark blue indicate edges between ZBI and CES-D items. “prop0” indicates the proportion of times parameters were estimated to be zero.

| Edge     | Sample | Bootstrap results |          |          |       |
|----------|--------|-------------------|----------|----------|-------|
|          |        | Mean              | CI lower | CI upper | prop0 |
| D8--D12  | 0.36   | 0.35              | 0.28     | 0.44     | 0     |
| Z5--Z9   | 0.35   | 0.33              | 0.26     | 0.44     | 0     |
| D3--D6   | 0.33   | 0.31              | 0.24     | 0.41     | 0     |
| D7--D20  | 0.31   | 0.30              | 0.22     | 0.39     | 0     |
| Z4--Z5   | 0.31   | 0.29              | 0.22     | 0.40     | 0     |
| D13--D14 | 0.29   | 0.26              | 0.20     | 0.38     | 0     |
| Z10--Z17 | 0.28   | 0.27              | 0.19     | 0.37     | 0     |
| D17--D18 | 0.28   | 0.27              | 0.19     | 0.38     | 0     |
| Z16--Z18 | 0.22   | 0.21              | 0.13     | 0.31     | 0     |
| D6--D18  | 0.22   | 0.22              | 0.13     | 0.31     | 0     |
| Z18--Z19 | 0.21   | 0.20              | 0.12     | 0.30     | 0     |
| D5--D20  | 0.19   | 0.18              | 0.11     | 0.27     | 0     |
| Z9--Z10  | 0.17   | 0.16              | 0.09     | 0.25     | 0     |
| Z15--Z16 | 0.18   | 0.17              | 0.09     | 0.27     | 0     |
| Z4--Z9   | 0.17   | 0.17              | 0.08     | 0.26     | 0     |
| Z7--Z19  | 0.15   | 0.14              | 0.06     | 0.23     | 0     |
| Z16--Z17 | 0.15   | 0.14              | 0.06     | 0.24     | 0.1   |
| Z4--Z17  | 0.14   | 0.13              | 0.05     | 0.22     | 0.1   |
| D3--D18  | 0.13   | 0.13              | 0.05     | 0.22     | 0.1   |
| D2--D20  | 0.14   | 0.13              | 0.05     | 0.24     | 0.4   |
| Z7--Z17  | 0.12   | 0.12              | 0.05     | 0.20     | 0.1   |
| D6--D20  | 0.13   | 0.11              | 0.05     | 0.21     | 0.1   |
| Z17--D8  | 0.12   | 0.11              | 0.05     | 0.20     | 0.3   |
| D9--D10  | 0.14   | 0.12              | 0.04     | 0.24     | 0.4   |
| D5--D7   | 0.13   | 0.12              | 0.03     | 0.23     | 0.4   |
| D12--D20 | 0.11   | 0.10              | 0.03     | 0.19     | 0.3   |
| D4--D12  | 0.13   | 0.12              | 0.03     | 0.22     | 0.7   |
| D14--D15 | 0.14   | 0.12              | 0.03     | 0.25     | 1.5   |
| Z10--Z15 | 0.11   | 0.11              | 0.03     | 0.20     | 1     |
| Z7--Z16  | 0.11   | 0.10              | 0.03     | 0.19     | 0.8   |
| Z7--D18  | 0.09   | 0.08              | 0.02     | 0.16     | 1.3   |
| D13--D20 | 0.10   | 0.09              | 0.02     | 0.18     | 1.8   |
| Z5--D1   | 0.10   | 0.09              | 0.02     | 0.18     | 1.8   |
| Z4--Z7   | 0.10   | 0.10              | 0.02     | 0.18     | 0.4   |
| Z19--D9  | 0.10   | 0.09              | 0.02     | 0.19     | 1.7   |
| D1--D3   | 0.10   | 0.09              | 0.02     | 0.19     | 2.1   |
| D3--D4   | 0.09   | 0.09              | 0.02     | 0.17     | 1.6   |
| D3--D15  | 0.13   | 0.11              | 0.02     | 0.23     | 2.5   |
| D10--D11 | 0.12   | 0.11              | 0.02     | 0.22     | 2.5   |
| D7--D11  | 0.11   | 0.10              | 0.02     | 0.20     | 2.1   |
| Z10--D7  | 0.10   | 0.09              | 0.02     | 0.19     | 2.1   |
| Z17--D9  | 0.09   | 0.08              | 0.01     | 0.17     | 3.1   |
| Z9--D10  | 0.08   | 0.06              | 0.01     | 0.15     | 4.8   |
| Z9--Z18  | 0.10   | 0.10              | 0.01     | 0.19     | 1.5   |
| D12--D18 | 0.08   | 0.07              | 0.01     | 0.15     | 2.5   |
| Z4--Z19  | 0.09   | 0.10              | 0.01     | 0.18     | 0.9   |
| D1--D5   | 0.10   | 0.08              | 0.01     | 0.19     | 5.4   |
| D6--D7   | 0.09   | 0.09              | 0.004    | 0.17     | 2.5   |
| D1--D15  | 0.09   | 0.08              | 0.003    | 0.18     | 5.6   |
| Z16--D12 | 0.08   | 0.07              | 0.003    | 0.15     | 4.5   |
| Z4--Z18  | 0.09   | 0.09              | 0.002    | 0.17     | 2.5   |
| D5--D14  | 0.09   | 0.07              | 0.001    | 0.18     | 5     |

Z4=Embarrassed of patient’s behaviour; Z5=Angry around the patient Z7=Afraid of patient’s future; Z9=Strained around the patient; Z10=Health affected by caregiving; Z15=Financially stressed; Z16=Unable to take care of the patient much; Z17=Sense of losing control over life; Z18=Wish to leave caring of the patient; Z19=Feel uncertain of what to do. D1=feeling bothered; D2=appetite changes; D3=feeling blue; D4=lack of feeling good; D5=difficulty with concentrating; D6=depressed mood; D7=everything was an effort; D8=hopelessness; D9=feeling of failure; D10=fearful; D11=sleep disturbances; D12=lack of happiness; D13=talking less; D14= lonely; D15=people unfriendly; D17=crying. D18=sadness; D20=inability to get going.



**Fig. S8.** Average correlations between centrality indices (strength) of networks sampled with persons dropped and the original sample (network 2b). The line indicates the means and areas indicate the range from the 2.5<sup>th</sup> to the 97.5<sup>th</sup> quantiles. Maximum drop proportions to retain correlation of 0.7 in at least 95% of the samples: 0.594.

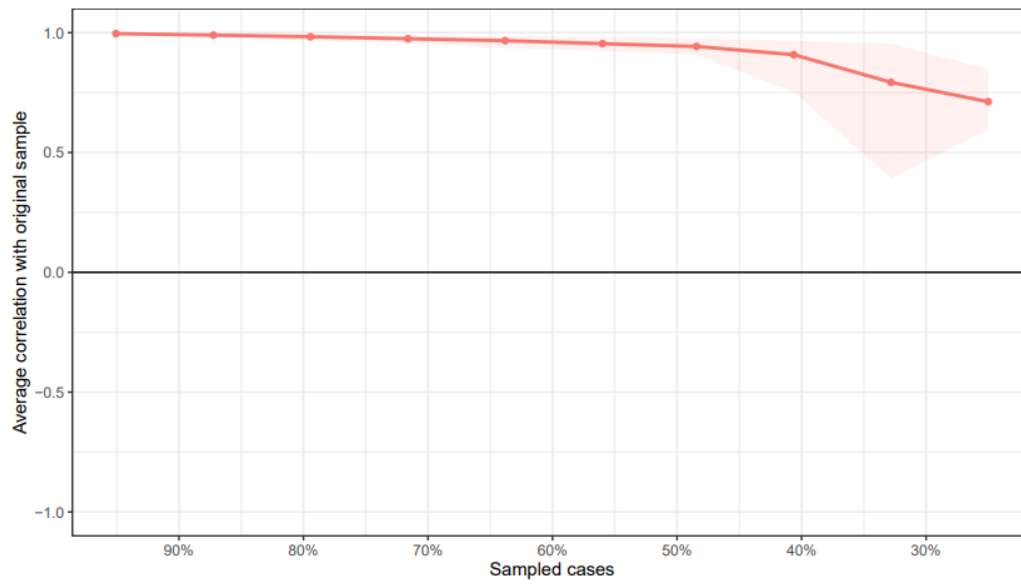

**Table S16.** Partial correlations matrix of network 3a (Fig. 3a): PE = Psychoeducation. Highlighted boxes indicate edges between psychoeducation and caregiving dimensions or CES-D symptoms.

|     | B1   | B2    | B3    | B4    | Z1    | Z2    | Z3    | Z4    | Z5   | D1   | D2   | D3    | D4    | D5    | D6   | D7   | D8    | D9    | D10  | D11   | D12  | D13   | D14   | D15 | D17   | D18  | D20 | PE |
|-----|------|-------|-------|-------|-------|-------|-------|-------|------|------|------|-------|-------|-------|------|------|-------|-------|------|-------|------|-------|-------|-----|-------|------|-----|----|
| B1  |      |       |       |       |       |       |       |       |      |      |      |       |       |       |      |      |       |       |      |       |      |       |       |     |       |      |     |    |
| B2  | 0    |       |       |       |       |       |       |       |      |      |      |       |       |       |      |      |       |       |      |       |      |       |       |     |       |      |     |    |
| B3  | 0.12 | 0.07  |       |       |       |       |       |       |      |      |      |       |       |       |      |      |       |       |      |       |      |       |       |     |       |      |     |    |
| B4  | 0.02 | 0.11  | 0.29  |       |       |       |       |       |      |      |      |       |       |       |      |      |       |       |      |       |      |       |       |     |       |      |     |    |
| Z1  | 0.30 | 0     | 0.10  | 0.06  |       |       |       |       |      |      |      |       |       |       |      |      |       |       |      |       |      |       |       |     |       |      |     |    |
| Z2  | 0.09 | 0     | 0     | 0.18  | 0.27  |       |       |       |      |      |      |       |       |       |      |      |       |       |      |       |      |       |       |     |       |      |     |    |
| Z3  | 0.05 | 0     | 0     | 0.09  | 0.11  | 0.18  |       |       |      |      |      |       |       |       |      |      |       |       |      |       |      |       |       |     |       |      |     |    |
| Z4  | 0.06 | 0     | 0.02  | 0     | 0.27  | 0.12  | 0.26  |       |      |      |      |       |       |       |      |      |       |       |      |       |      |       |       |     |       |      |     |    |
| Z5  | 0    | 0     | 0.10  | 0.01  | 0.15  | 0     | 0     | 0.004 |      |      |      |       |       |       |      |      |       |       |      |       |      |       |       |     |       |      |     |    |
| D1  | 0.13 | 0     | 0     | 0     | 0.05  | 0     | 0.08  | 0     | 0    |      |      |       |       |       |      |      |       |       |      |       |      |       |       |     |       |      |     |    |
| D2  | 0.03 | 0     | 0     | 0     | 0     | 0     | 0     | 0     | 0    | 0.01 |      |       |       |       |      |      |       |       |      |       |      |       |       |     |       |      |     |    |
| D3  | 0    | 0     | 0     | 0     | 0     | 0     | 0     | 0     | 0    | 0.10 | 0.09 |       |       |       |      |      |       |       |      |       |      |       |       |     |       |      |     |    |
| D4  | 0    | -0.1  | 0     | 0     | 0     | 0     | 0     | -0.01 | 0    | 0    | 0    | 0.09  |       |       |      |      |       |       |      |       |      |       |       |     |       |      |     |    |
| D5  | 0    | 0     | 0.001 | 0.05  | 0.02  | 0     | 0     | 0     | 0.03 | 0.09 | 0.03 | 0     | 0     |       |      |      |       |       |      |       |      |       |       |     |       |      |     |    |
| D6  | 0    | 0     | 0     | 0     | 0.03  | 0     | 0     | 0     | 0    | 0.04 | 0.01 | 0.32  | 0.04  | 0.03  |      |      |       |       |      |       |      |       |       |     |       |      |     |    |
| D7  | 0    | 0     | 0     | 0.005 | 0.07  | 0.003 | 0     | 0     | 0    | 0.04 | 0.04 | 0.01  | 0     | 0.13  | 0.10 |      |       |       |      |       |      |       |       |     |       |      |     |    |
| D8  | 0    | -0.09 | 0     | 0.01  | 0.02  | 0.02  | 0     | 0     | 0    | 0    | 0    | 0.04  | 0.04  | 0.001 | 0.02 | 0    |       |       |      |       |      |       |       |     |       |      |     |    |
| D9  | 0    | -0.04 | 0     | 0.003 | 0.11  | 0     | 0     | 0     | 0.06 | 0    | 0    | 0.07  | 0.05  | 0     | 0.04 | 0.01 | 0.05  |       |      |       |      |       |       |     |       |      |     |    |
| D10 | 0    | 0     | 0     | 0     | 0.04  | 0     | 0     | 0     | 0    | 0    | 0.01 | 0     | 0     | 0.02  | 0.08 | 0.01 | 0.01  | 0.14  |      |       |      |       |       |     |       |      |     |    |
| D11 | 0    | 0     | 0     | 0.04  | 0     | 0     | 0.03  | 0     | 0    | 0    | 0.06 | 0     | 0     | 0.03  | 0.05 | 0.11 | 0.01  | 0     | 0.12 |       |      |       |       |     |       |      |     |    |
| D12 | 0    | -0.13 | 0.01  | 0     | 0.11  | 0.02  | 0     | 0     | 0.01 | 0.01 | 0.01 | 0     | 0.11  | 0     | 0    | 0    | 0.36  | 0.05  | 0    | 0     |      |       |       |     |       |      |     |    |
| D13 | 0    | 0     | 0     | 0     | 0     | 0     | 0     | 0     | 0    | 0.02 | 0.08 | 0.01  | 0.04  | 0     | 0    | 0.01 | 0     | 0.02  | 0.05 | 0.03  | 0.01 |       |       |     |       |      |     |    |
| D14 | 0    | 0     | 0.03  | 0.07  | 0.03  | 0.04  | 0.03  | 0     | 0.02 | 0    | 0.02 | 0.03  | 0.003 | 0.08  | 0.08 | 0.06 | 0     | 0.02  | 0    | 0.004 | 0.01 | 0.28  |       |     |       |      |     |    |
| D15 | 0    | 0     | 0.00  | 0.07  | 0     | 0     | 0.02  | 0     | 0    | 0.08 | 0    | 0.12  | 0     | 0     | 0    | 0.03 | 0     | 0     | 0.07 | 0     | 0    | 0.005 | 0.12  |     |       |      |     |    |
| D17 | 0    | 0     | 0.03  | 0     | 0     | 0     | 0     | 0     | 0    | 0    | 0.03 | 0.08  | 0.07  | 0     | 0.09 | 0    | 0     | 0.04  | 0    | 0     | 0    | 0     | 0.02  | 0   |       |      |     |    |
| D18 | 0    | 0     | 0     | 0.09  | 0.002 | 0     | 0     | 0     | 0.04 | 0    | 0    | 0.13  | 0     | 0     | 0.22 | 0.06 | 0     | 0.07  | 0.08 | 0.05  | 0.08 | 0     | 0.06  | 0   | 0.28  |      |     |    |
| D20 | 0    | -0    | 0     | 0     | 0     | 0     | 0     | 0     | 0.01 | 0.02 | 0.14 | 0.004 | 0.01  | 0.19  | 0.13 | 0.31 | 0.08  | 0.01  | 0.01 | 0.04  | 0.11 | 0.10  | 0     | 0   | 0     | 0.08 |     |    |
| PE  | 0    | 0.05  | 0     | 0     | -0.08 | 0     | -0.02 | -0.01 | 0    | 0    | 0    | 0     | -0.05 | 0     | 0    | 0    | -0.01 | -0.01 | 0    | 0     | 0    | 0     | -0.01 | 0   | -0.04 | 0    | 0   | 0  |

**Table S17.** Partial correlations matrix of network 3b (Fig. 3b): PE = Psychoeducation. Highlighted boxes indicate edges between psychoeducation and ZBI items from the Negative Emotion/Consequences dimension or CES-D symptoms.

|     | Z4   | Z5    | Z7    | Z9   | Z10   | Z15   | Z16   | Z17   | Z18   | Z19   | D1   | D2   | D3    | D4    | D5   | D6   | D7    | D8     | D9    | D10  | D11  | D12  | D13   | D14   | D15  | D17   | D18  | D20 |
|-----|------|-------|-------|------|-------|-------|-------|-------|-------|-------|------|------|-------|-------|------|------|-------|--------|-------|------|------|------|-------|-------|------|-------|------|-----|
| Z4  |      |       |       |      |       |       |       |       |       |       |      |      |       |       |      |      |       |        |       |      |      |      |       |       |      |       |      |     |
| Z5  | 0.30 |       |       |      |       |       |       |       |       |       |      |      |       |       |      |      |       |        |       |      |      |      |       |       |      |       |      |     |
| Z7  | 0.10 | 0     |       |      |       |       |       |       |       |       |      |      |       |       |      |      |       |        |       |      |      |      |       |       |      |       |      |     |
| Z9  | 0.17 | 0.35  | 0     |      |       |       |       |       |       |       |      |      |       |       |      |      |       |        |       |      |      |      |       |       |      |       |      |     |
| Z10 | 0    | 0     | 0     | 0.17 |       |       |       |       |       |       |      |      |       |       |      |      |       |        |       |      |      |      |       |       |      |       |      |     |
| Z15 | 0    | 0     | 0.05  | 0    | 0.11  |       |       |       |       |       |      |      |       |       |      |      |       |        |       |      |      |      |       |       |      |       |      |     |
| Z16 | 0    | 0.01  | 0.11  | 0    | 0.06  | 0.18  |       |       |       |       |      |      |       |       |      |      |       |        |       |      |      |      |       |       |      |       |      |     |
| Z17 | 0.13 | 0.01  | 0.12  | 0.02 | 0.28  | 0.05  | 0.15  |       |       |       |      |      |       |       |      |      |       |        |       |      |      |      |       |       |      |       |      |     |
| Z18 | 0.09 | 0.02  | 0     | 0.10 | 0.07  | 0.01  | 0.22  | 0.04  |       |       |      |      |       |       |      |      |       |        |       |      |      |      |       |       |      |       |      |     |
| Z19 | 0.09 | 0.05  | 0.14  | 0.08 | 0.06  | 0     | 0.06  | 0     | 0.20  |       |      |      |       |       |      |      |       |        |       |      |      |      |       |       |      |       |      |     |
| D1  | 0.03 | 0.10  | 0     | 0.03 | 0.003 | 0     | 0     | 0.03  | 0.06  | 0.02  |      |      |       |       |      |      |       |        |       |      |      |      |       |       |      |       |      |     |
| D2  | 0    | 0     | 0     | 0    | 0.01  | 0     | 0     | 0     | 0     | 0     | 0.02 |      |       |       |      |      |       |        |       |      |      |      |       |       |      |       |      |     |
| D3  | 0    | 0     | 0     | 0    | 0     | 0     | 0     | 0     | 0     | 0     | 0.10 | 0.09 |       |       |      |      |       |        |       |      |      |      |       |       |      |       |      |     |
| D4  | 0    | 0     | -0.04 | 0    | 0     | 0     | 0     | 0     | 0     | 0     | 0    | 0    | 0.09  |       |      |      |       |        |       |      |      |      |       |       |      |       |      |     |
| D5  | 0    | 0     | 0     | 0.03 | 0.05  | 0.01  | 5E-04 | 0     | 0     | 0     | 0.09 | 0.03 | 0     | 0     |      |      |       |        |       |      |      |      |       |       |      |       |      |     |
| D6  | 0    | 0     | 0.02  | 0    | 0.07  | 0     | 0     | 0.02  | 0     | 0     | 0.04 | 0.01 | 0.32  | 0.04  | 0.02 |      |       |        |       |      |      |      |       |       |      |       |      |     |
| D7  | 0    | 0     | 0     | 0.02 | 0.10  | 0.04  | 0.02  | 0.01  | 0     | 0     | 0.04 | 0.04 | 0.01  | 0     | 0.13 | 0.09 |       |        |       |      |      |      |       |       |      |       |      |     |
| D8  | 0    | 0     | 0.08  | 0    | 0     | 0     | 0     | 0.12  | 0     | 0.01  | 0    | 0    | 0.03  | 0.05  | 0    | 0    | 0     |        |       |      |      |      |       |       |      |       |      |     |
| D9  | 0.02 | 0.01  | 0     | 0    | 0     | 0.06  | 0.002 | 0.09  | 0     | 0.10  | 0    | 0    | 0.07  | 0.06  | 0    | 0.03 | 0.005 | 0.03   |       |      |      |      |       |       |      |       |      |     |
| D10 | 0    | 0     | 0     | 0.08 | 0     | 0.002 | 0     | 0     | 0     | 0     | 0    | 0.01 | 0     | 0     | 0.02 | 0.07 | 0.01  | 0.003  | 0.14  |      |      |      |       |       |      |       |      |     |
| D11 | 0    | 0     | 0.01  | 0.03 | 0.01  | 0.04  | 0     | 0     | 0     | 0     | 0    | 0.06 | 0     | 0     | 0.03 | 0.05 | 0.11  | 0.004  | 0     | 0.12 |      |      |       |       |      |       |      |     |
| D12 | 0    | 0.01  | 0     | 0.07 | 0.02  | 0     | 0.08  | 0.02  | 0     | 0.03  | 0.01 | 0.02 | 0     | 0.12  | 0    | 0    | 0     | 0.36   | 0.06  | 0    | 0    |      |       |       |      |       |      |     |
| D13 | 0.01 | 0     | 0     | 0    | 0     | 0     | 0     | 0     | 0     | 0     | 0.02 | 0.08 | 0.01  | 0.04  | 0    | 0    | 0.01  | 0      | 0.01  | 0.05 | 0.03 | 0.01 |       |       |      |       |      |     |
| D14 | 0    | 0     | 0     | 0    | 0.05  | 0.06  | 0     | 0.07  | 0     | 0.03  | 0    | 0.02 | 0.03  | 0     | 0.09 | 0.08 | 0.06  | 0      | 0.01  | 0    | 0.01 | 0.01 | 0.28  |       |      |       |      |     |
| D15 | 0.01 | 0     | 0     | 0    | 0     | 0.06  | 0     | 0     | 0     | 0     | 0.09 | 0    | 0.12  | 0     | 0    | 0    | 0.03  | 0      | 0     | 0.07 | 0    | 0    | 0.005 | 0.14  |      |       |      |     |
| D17 | 0    | 0     | 0     | 0    | 0.003 | 0     | 0     | 0     | 0     | 0.02  | 0    | 0.03 | 0.08  | 0.07  | 0    | 0.09 | 0     | 0      | 0.04  | 0    | 0    | 0    | 0     | 0     | 0.02 | 0     |      |     |
| D18 | 0    | 0     | 0.09  | 0.02 | 0     | 0     | 0.01  | 0     | 0     | 0     | 0    | 0    | 0.14  | 0     | 0    | 0.22 | 0.06  | 0      | 0.07  | 0.07 | 0.05 | 0.08 | 0     | 0.07  | 0    | 0.28  |      |     |
| D20 | 0    | 0     | 0     | 0    | 0     | 0     | 0.02  | 0     | -0    | 0     | 0.02 | 0.14 | 0.005 | 0.01  | 0.19 | 0.13 | 0.30  | 0.07   | 0.01  | 0.01 | 0.04 | 0.11 | 0.10  | 0     | 0    | 0     | 0.08 |     |
| PE  | 0    | -0.03 | 0     | 0    | 0     | -0.05 | -0.04 | -0.06 | -0.01 | -0.03 | 0    | 0    | 0     | -0.06 | 0    | 0    | 0     | -0.001 | -0.01 | 0    | 0    | 0    | 0     | -0.01 | 0    | -0.04 | 0    | 0   |
